# Supplementary material for: Profiling MAP kinase cysteines for targeted covalent inhibitor design
Source: Royal Society of Chemistry journal article supplement (doi:10.1039/d1md00277e), 2021-11-03
Supplement: d1md00277e1.pdf [file d1md00277e1.pdf]

**Supporting Information:**  
**Profiling MAP Kinase Cysteines for Targeted  
Covalent Inhibitor Design**

Ruibin Liu, Neha Verma, Shaoqi Zhan, Jack Henderson, and Jana Shen\*

*Department of Pharmaceutical Sciences, University of Maryland School of Pharmacy,  
Baltimore, MD 21201*

E-mail: [jana.shen@rx.umaryland.edu](mailto:jana.shen@rx.umaryland.edu)

## List of Tables

- S1  $pK_a$  values of the CpHMD predicted reactive cysteines and lysines in MAP kinases in comparison to the empirical calculations<sup>a</sup> . . . . . S-3
- S2 Calculated  $pK_a$ 's of DFG-1 cysteines in ERK1/2 and MKK7 and the local conformational environment<sup>a</sup> . . . . . S-4

## List of Figures

- S1 Titration curves of the FP Cys and its h-bond interactions in JNK1, JNK2, and JNK3. . . . . S-5
- S2 Salt-bridge and h-bond formation of the DFG-1 Cys in ERK1 at high pH . . S-6
- S3 Salt-bridge and h-bond formation of the DFG-1 Cys in ERK2 at high pH . . S-6
- S4 Salt-bridge and h-bond formation of the DFG-1 Cys in MKK7 (DFG-in) at high pH . . . . . S-7
- S5 **Example  $pK_a$  convergence plots.** Calculated  $pK_a$ 's for C116 in JNK2, C119 in p38 $\alpha$ , and C183 in ERK1 as a function of simulation time per pH replica. Data from the last 20 ns per replica are shown. The total simulation time is 20 ns for JNK2, 50 ns for p38 $\alpha$ , and 80 ns for ERK1. All simulations were run until the relevant Cys  $pK_a$  was converged. Errors in the calculated  $pK_a$ 's for all cysteines are given in Table S1. . . . . S-7

## Supplemental tables

Table S1:  $pK_a$  values of the CpHMD predicted reactive cysteines and lysines in MAP kinases in comparison to the empirical calculations<sup>a</sup>

| Kinase                | PDB       | Residue                         | CpHMD                | PROPKA    | Residue                              | CpHMD                | PROPKA    |
|-----------------------|-----------|---------------------------------|----------------------|-----------|--------------------------------------|----------------------|-----------|
| JNK1 (MAPK8)          | 2xrw      | <b>C116 (FP)</b> <sup>S1</sup>  | 7.5 (0.0)            | 10.0      | <b>C245</b> ( $\alpha$ H head)       | 7.8 (0.1)            | 9.0       |
| JNK2 (MAPK9)          | 3e7o      | <b>C116 (FP)</b> <sup>S1</sup>  | 8.0 (0.1)            | 10.2      | K153 (HRD+2)                         | 8.9 (0.1)            | 10.1      |
| JNK3 (MAPK10)         | 6emh      | <b>C154 (FP)</b> <sup>S2</sup>  | 6.3 (0.1)            | 10.4      | <b>C177</b> (a.I DFG+6) <sup>b</sup> | < 7.0                | 9.1       |
|                       |           |                                 |                      |           | <b>C283</b> ( $\alpha$ H head)       | 7.6 (0.0)            | 9.2       |
| P38 $\alpha$ (MAPK14) | 5tbe      | <b>C119 (EFP)</b> <sup>S3</sup> | 6.9 (0.2)            | 9.3       |                                      |                      |           |
| P38 $\beta$ (MAPK11)  | 3gc8      |                                 |                      |           | C119 (EFP)                           | 9.4 (0.1)            | 9.1       |
| P38 $\gamma$ (MAPK12) | 1cm8      |                                 |                      |           |                                      |                      |           |
| P38 $\delta$ (MAPK13) | 5ekn      |                                 |                      |           |                                      |                      |           |
| ERK1 (MAPK3)          | 6ges      | <b>C183 (DFG-1)</b>             | 9.1 (0.0)            | 12.7      | C144 ( $\alpha$ E head), C271 (C.I)  | 8.8 (0.0), 7.4 (0.2) | 11.3, 9.3 |
| ERK2 (MAPK1)          | 3w55/6g54 | <b>C166 (DFG-1)</b>             | 9.9 (0.1)/10.0 (0.1) | 11.9/13.9 | C254 (C.I)                           | 7.2 (0.1)/6.8 (0.3)  | 9.3/9.2   |
| ERK5 (MAPK7)          | 4ic8      |                                 |                      |           | C208 (a.I DFG+6)                     | < 7.0                | 10.2      |
|                       |           |                                 |                      |           | C359 (CT)                            | 8.2 (0.2)            | 13.0      |
| ERK3 (MAPK6)          | 2i6l      |                                 |                      |           | C28 (g.I 5), C42 (N.I)               | 7.8 (0.2), 9.2 (0.1) | 9.2, 9.5  |
| ERK4 (MAPK4)          | HM        |                                 |                      |           | K151 (HRD+2)                         | 9.4 (0.1)            | 10.6      |
| ERK7 (MAPK15)         | HM        |                                 |                      |           | K29 ( $\beta$ II)                    | 9.0 (0.0)            | 9.9       |
|                       |           |                                 |                      |           | K42 (catalytic)                      | 8.4 (0.1)            | 10.6      |
|                       |           |                                 |                      |           | C154 (DFG-1)                         | 9.5 (0.2)            | 14.0      |
|                       |           |                                 |                      |           | C249 ( $\alpha$ I head)              | < 7.0                | 9.3       |
| NLK (NLK)             | HM        |                                 |                      |           | K167 (catalytic)                     | 7.9 (0.2)            | 11.7      |
|                       |           |                                 |                      |           | C179 ( $\alpha$ C head)              | 8.4 (0.1)            | 9.6       |
|                       |           |                                 |                      |           | C281 (DFG-1)                         | 9.7 (0.1)            | 12.8      |
|                       |           |                                 |                      |           | C369 (C.I)                           | < 7.0                | 8.4       |

<sup>a</sup>Residues that have been targeted by covalent inhibitors or chemical probes in the chemoproteomic screening are indicated in bold font. Errors from block analysis are given in parentheses. The block length is 5 ns per replica. In case of incomplete titration, i.e.,  $pK_a < 7.0$ , error analysis was not meaningful and thus not performed. For those proteins without a published X-ray structure, simulations started from a homology model (HM). Two crystal structures, 3w55 and 6g54, were used to calculate  $pK_a$ 's of ERK2. The main difference between them is that the carboxamide group of Asn154 in 3w55 is rotated by 180° with respect to that in 6g54. The similar  $pK_a$ 's for the DFG-1 cysteine suggests that the sidechain conformation of Asn154 has little effect on the N-C hydrogen bonding which is a major determinant for the cysteine  $pK_a$ . DFG-1  $pK_a$ 's for ERK2, ERK7, and NLK are listed as references. <sup>b</sup>Calculated using 3npc crystal structure since it is S177 in 3e7o.

Table S2: Calculated  $pK_a$ 's of DFG-1 cysteines in ERK1/2 and MKK7 and the local conformational environment<sup>a</sup>

| Kinase | PDB               | Conformation               | Cys $pK_a$       | Asp–Asn | Cys–Asn | Cys–Asp | Cys–Lys          | Asp–Lys          | Glu/Asp–Lys      | $\zeta$ (Cys) |
|--------|-------------------|----------------------------|------------------|---------|---------|---------|------------------|------------------|------------------|---------------|
| ERK1   | 6ges              | DFG-in/ $\alpha$ C-in      | 9.1              | 3.8     | 4.3     | 5.9     | 6.6              | 5.1              | 2.9              | 58.4          |
| ERK2   | 6g54              | DFG-in/ $\alpha$ C-in      | 10.0             | 2.9     | 4.1     | 4.6     | 6.9              | 3.7              | 2.8              | 62.0          |
| MKK7   | 6qft              | DFG-in/ $\alpha$ C-in      | 9.8              | 4.3     | 4.1     | 5.5     | 7.5              | 5.4              | 3.2              | 68.9          |
| MKK7   | 6qfr <sup>b</sup> | DFG-outlike/ $\alpha$ C-in | 8.2              | 7.4     | 4.5     | 3.5     | 9.1 <sup>b</sup> | 3.6 <sup>b</sup> | 4.1 <sup>b</sup> | 227.7         |
| MKK7   | 7cbx              | DFG-outlike/ $\alpha$ C-in | 6.7 <sup>c</sup> | 7.3     | 4.1     | 3.7     | 7.3              | 2.6              | 5.4              | 231.0         |

<sup>a</sup> Column 4 lists the CpHMD calculated  $pK_a$ 's of the DFG-1 Cys. Column 5–10 list the various distances. Asp–Asn refers to the minimum distance between the carboxamide nitrogen or oxygen of the HRD+5 Asn and the carboxylate oxygen of DFG-Asp. Cys–Asn, Cys–Asp, and Cys–Lys refer to the distance from the sulfur of DFG-1 Cys to the carboxamide nitrogen of HRD+5 Asn, the nearest carboxylate oxygen of DFG-1 Asp, and the amine nitrogen of the catalytic Lys, respectively. Asp–Lys refers to the distance from the DFG-Asp and the catalytic Lys. Glu/Asp–Lys refers to the distance between the amine nitrogen of the catalytic Lys and the nearest carboxylate oxygen of  $\alpha$ C-Glu in ERK1/2 or  $\alpha$ C-Asp in MKK7.  $\zeta$ (Cys) refers to the pseudo torsion angle defined by the four CA atoms of DFG-2, DFG-1 Cys, DFG-Asp, and DFG-Phe residues.<sup>S4,S5</sup>

<sup>b</sup>The amine nitrogen of the catalytic Lys is missing in the crystal structure 6qfr. The distances were taken from OpenMM homology modeling.

## Supplemental figures

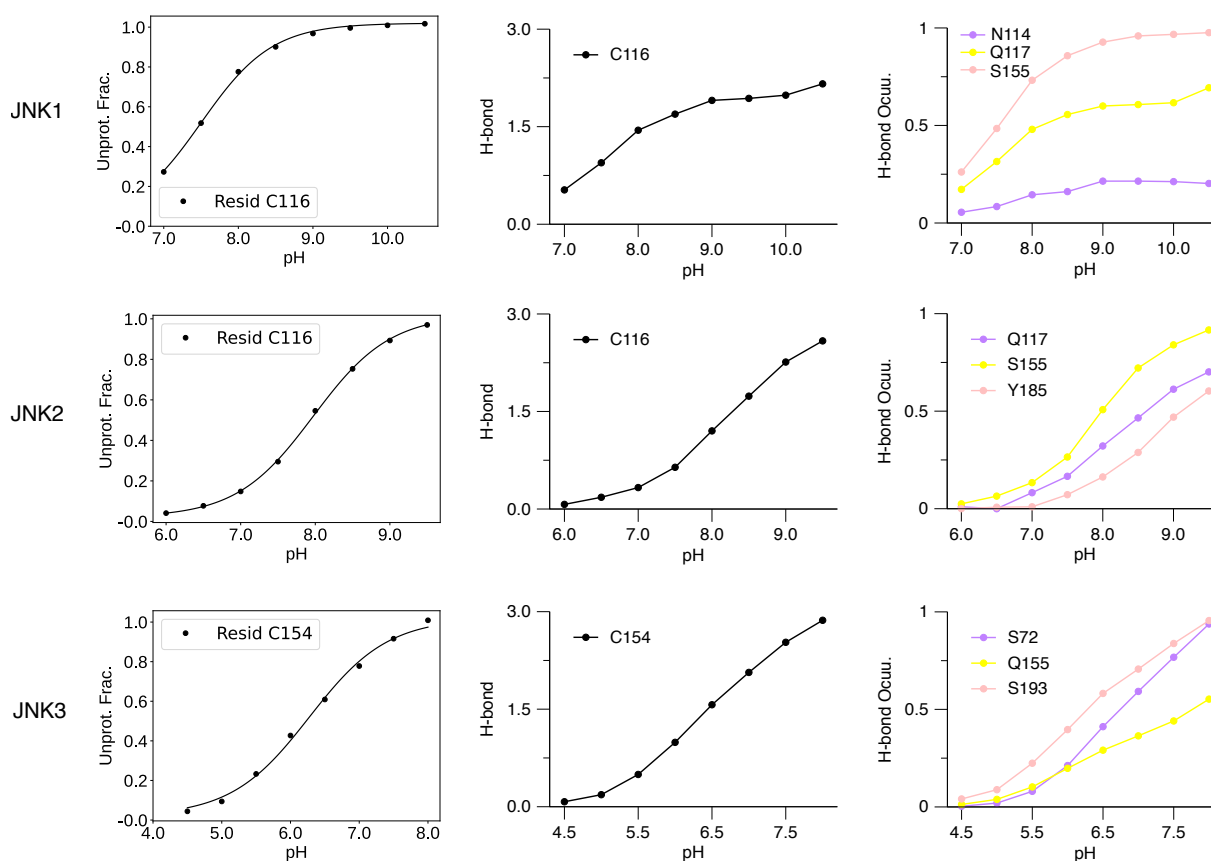

Figure S1: **Titration of the FP Cys and local hydrogen bonding interactions in JNK1, JNK2, and JNK3.** (a) pH-dependent deprotonated fractions of C116 in JNK1, C116 in JNK2, and C154 in JNK3. Curve represents the best fit to the Henderson-Hasselbalch equation. (b) pH-dependent h-bond formation of the FP Cys. (c) pH-dependent occupancy of the hydrogen bonds. A hydrogen bond is considered present if the heavy-atom donor-acceptor distance is below 3.5 Å and the donor-hydrogen-acceptor angle greater than 150 degree.

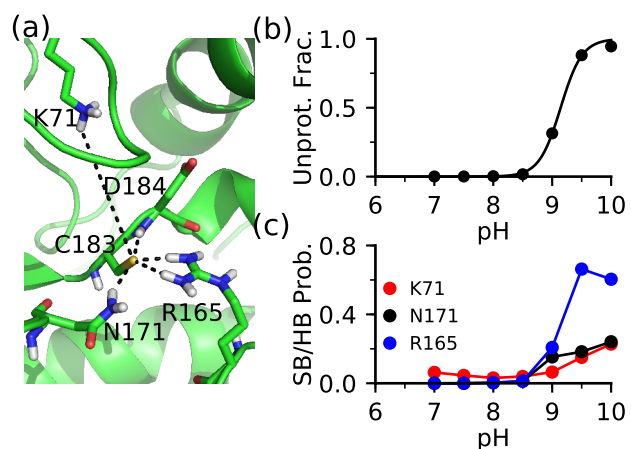

Figure S2: **Salt-bridge and h-bond formation of Cys183 in ERK1 (pdb 6ges) at high pH conditions.** (a) The DFG+1 Cys183 forms salt bridges with the catalytic Lys71 and HRD Arg165, and it accepts a hydrogen bond from the sidechain of HRD+5 Asn171. Note that the two salt bridges are exclusive. (b) Cys183 deprotonation fraction as a function of pH. (c) Salt-bridge or h-bond probabilities for Cys183 as a function of pH.

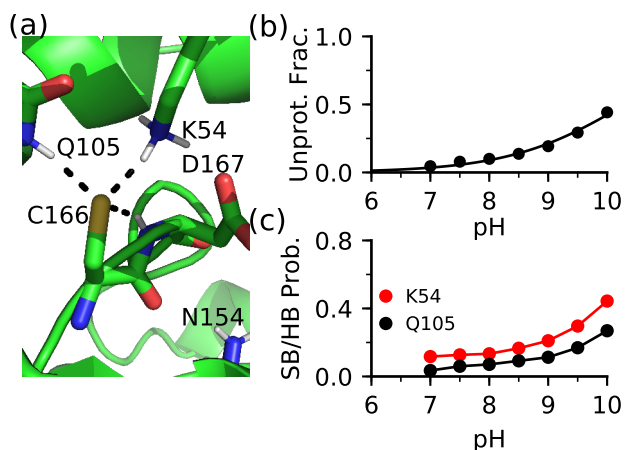

Figure S3: **Salt-bridge and h-bond formation of Cys166 in ERK2 (pdb 6g54) at high pH conditions.** (a) The DFG+1 Cys166 forms a salt bridge with the catalytic Lys54 and hydrogen bond with Gln105 backbone at the hinge region. The HRD+5 Asn has no hydrogen bond with Cys166. (b) Cys166 deprotonation fraction as a function of pH. (c) Salt bridge and hydrogen bond probabilities for Cys166 as a function of pH. Note that the HRD+6 Asn154 does not form a h-bond with Cys166.

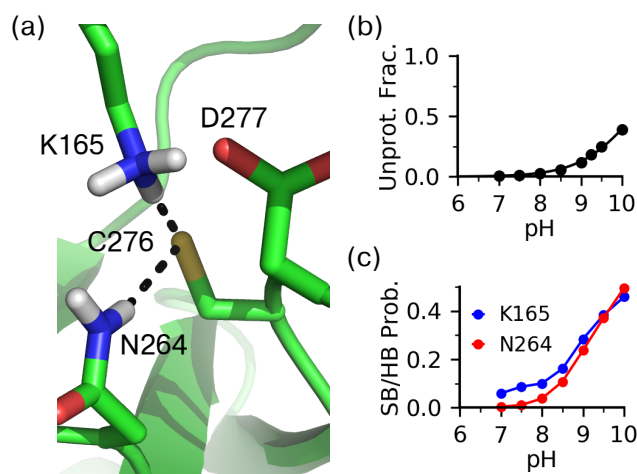

Figure S4: **Salt-bridge and h-bond formation of Cys276 in MKK7 (pdb 6qft) at high pH conditions.** (a) The DFG+1 Cys276 forms a salt bridge with the catalytic Lys165 and a hydrogen bond with the HRD+5 Asn264. Note that the DFG-Asp sidechain is in the DFG-in conformation. (b) Cys276 deprotonation fraction as a function of pH. (c) Salt-bridge and h-bond probabilities for Cys276 as a function of pH.

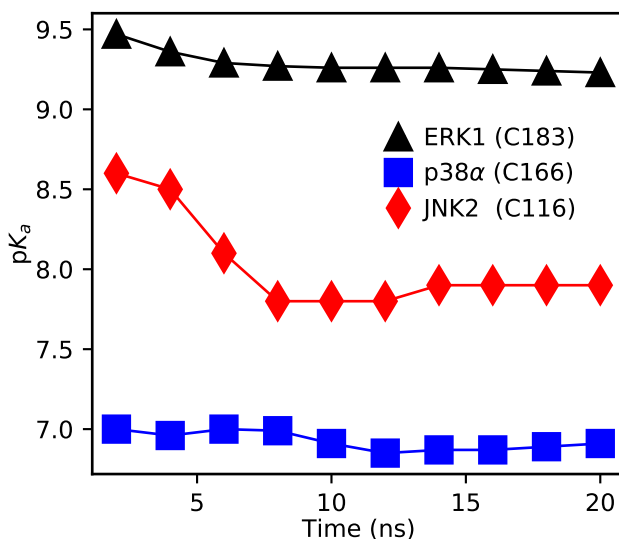

Figure S5: **Example  $pK_a$  convergence plots.** Calculated  $pK_a$ 's for C116 in JNK2, C119 in p38 $\alpha$ , and C183 in ERK1 as a function of simulation time per pH replica. Data from the last 20 ns per replica are shown. The total simulation time is 20 ns for JNK2, 50 ns for p38 $\alpha$ , and 80 ns for ERK1. All simulations were run until the relevant Cys  $pK_a$  was converged. Errors in the calculated  $pK_a$ 's for all cysteines are given in Table S1.

## References

- (S1) Zhang, T.; Inesta-Vaquera, F.; Niepel, M.; Zhang, J.; Ficarro, S. B.; Machleidt, T.; Xie, T.; Marto, J. A.; Kim, N.; Sim, T.; Laughlin, J. D.; Park, H.; LoGrasso, P. V.; Patricelli, M.; Nomanbhoy, T. K.; Sorger, P. K.; Alessi, D. R.; Gray, N. S. Discovery of Potent and Selective Covalent Inhibitors of JNK. *Chem. Biol.* **2012**, *19*, 140–154.
- (S2) Muth, F.; El-Gokha, A.; Ansideri, F.; Eitel, M.; Do, E.; Sievers-Engler, A.; Lange, A.; Boeckler, F. M.; Lam, M.; Laufer, S. A. Tri- and Tetrasubstituted Pyridinylimidazoles as Covalent Inhibitors of C-Jun N-Terminal Kinase 3. *J. Med. Chem.* **2017**, *60*, 594–607.
- (S3) Li, J.; Kaoud, T. S.; LeVieux, J.; Gilbreath, B.; Moharana, S.; Dalby, K. N.; Kerwin, S. M. A Fluorescence-Based Assay for P38 $\alpha$  Recruitment Site Binders: Identification of Rooperol as a Novel P38 $\alpha$  Kinase Inhibitor. *ChemBioChem* **2013**, *14*, 66–71.
- (S4) Möbitz, H. The ABC of Protein Kinase Conformations. *Biochim. Biophys. Acta* **2015**, *1854*, 1555–1566.
- (S5) Tsai, C.-C.; Yue, Z.; Shen, J. How Electrostatic Coupling Enables Conformational Plasticity in a Tyrosine Kinase. *J. Am. Chem. Soc.* **2019**, *141*, 15092–15101.
